# Supplementary material for: Hollow polymer microcapsule embedded transparent and heat-insulating film
Source: Royal Society of Chemistry journal article supplement (doi:10.1039/c8ra00801a), 2018-01-01
Supplement: c8ra00801a1.pdf [file c8ra00801a1.pdf]

Supporting Information for:

# Hollow Polymer Microcapsule Embedded Transparent and Heat-insulating Film

Chae Bin Kim, Nam-Ho, You, and Munju Goh\*

Institute of Advanced Composites Materials, Korea Institute of Science and Technology (KIST), Chudong-ro 92,  
Bongdong-eup, Wanju-gun, Jeonrabuk-do, 55324, Korea

\*Corresponding Author. E-mail address: goh@kist.re.kr

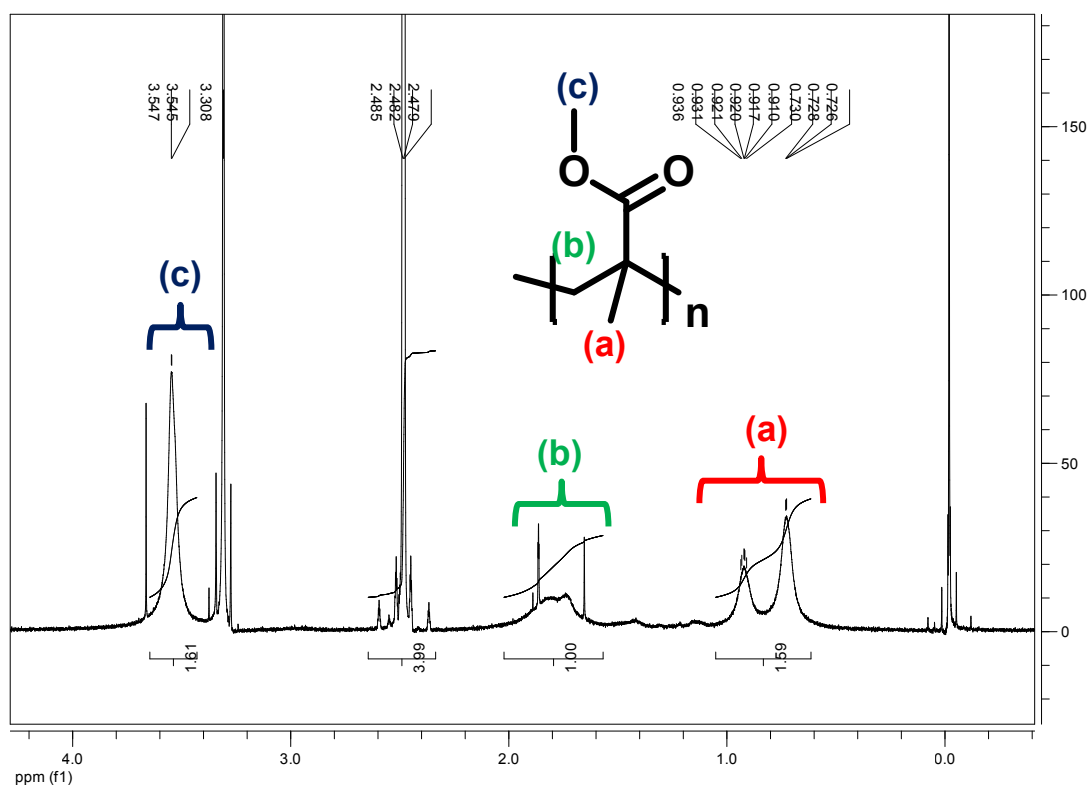

Figure S1. <sup>1</sup>H-NMR of the synthesized hollow PMMA microcapsule.

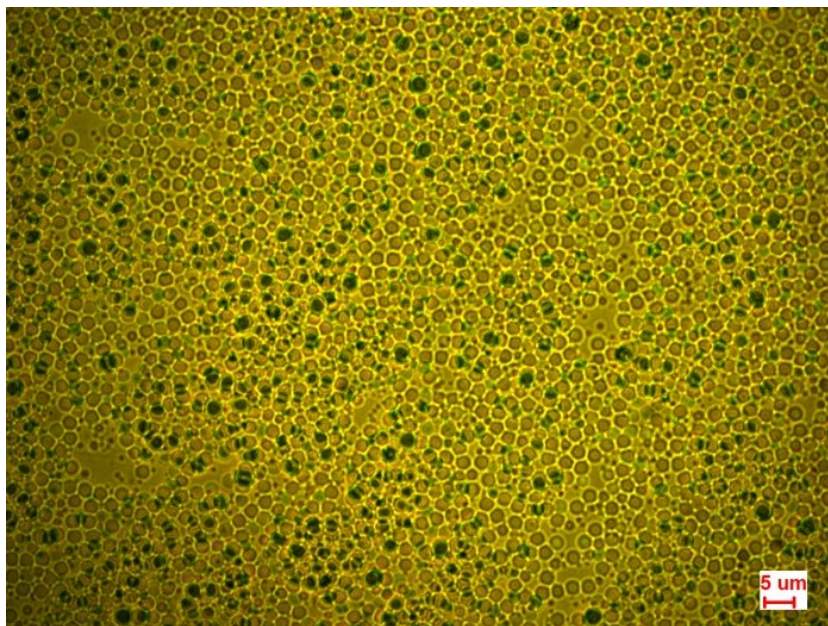

**Figure S2.** Optical micrograph of the NOA65 sample possessing 30 wt% microcapsules.
